# Supplementary material for: Silver Nanoparticle Chains for Ultra-Long-Range Plasmonic Waveguides for Nd3+ Fluorescence
Source: MDPI journal article supplement (doi:10.3390/nano12234296), 2022-12-03
Supplement: s1 [file s1]

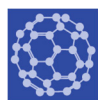

# Silver Nanoparticle Chains for Ultra-Long-Range Plasmonic Waveguides for Nd<sup>3+</sup> Fluorescence

Javier Fernández-Martínez <sup>1</sup>, Sol Carretero-Palacios <sup>1</sup>, Pablo Molina <sup>1</sup>, Jorge Bravo-Abad <sup>2,3</sup>, Mariola O. Ramírez <sup>1,3,\*</sup> and Luisa E. Bausá <sup>1,3</sup>

Experimental setup: dual confocal microscopy

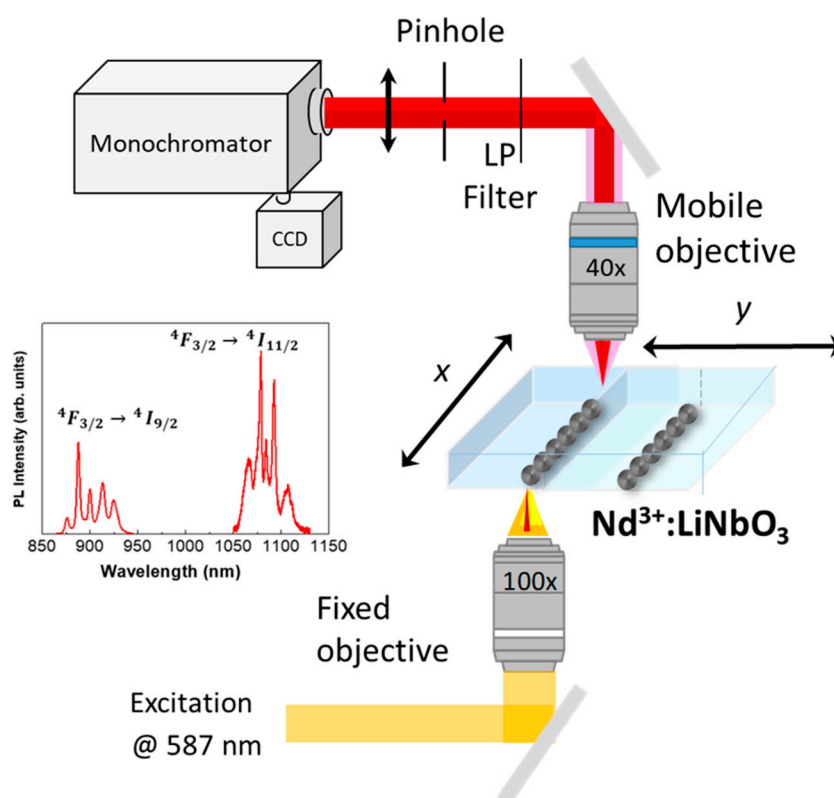

**Figure S1.** Schematics of the double confocal microscope employed in this study. The sample is excited by a 587 nm cw optically-pumped semiconductor laser (OPSL), focused with a fixed 100x (NA=0.9) microscope objective. The Nd<sup>3+</sup> photoluminescence (PL) is collected in transmission configuration with a mobile 40x objective (NA=0.6), attached to a XYZ piezoelectric stage. The PL is driven through a lowpass filter, with the aim of suppressing the remaining laser, and a 1 mm diameter pinhole to increase the spatial resolution. Detection is carried out by a Peltier-cooled CCD connected to a monochromator. The excitation polarization is set parallel to the axis of the chains by a  $\lambda/2$  plate, and a specific polarization of the Nd<sup>3+</sup> PL can be collected inserting a linear polarizer within its optical path. The inset shows the emission spectrum of Nd<sup>3+</sup> in LiNbO<sub>3</sub> for the  $^4F_{3/2} \rightarrow ^4I_{9/2}$  and  $^4F_{3/2} \rightarrow ^4I_{11/2}$  optical transitions.
